# Supplementary material
Source: Research Square preprint supplement (doi:10.21203/rs.3.rs-8982386/v1)
Supplement: Supplementary file 1 [file bb1607cf6b018f44a6a81a22.docx]

Appendix

Appendix A:

COREQ (Consolidated criteria for Reporting Qualitative research) Checklist

A checklist of items that should be included in reports of qualitative research. You must report the page number in your manuscript where you consider each of the items listed in this checklist. If you have not included this information, either revise your manuscript accordingly before submitting or note N/A.

| **Topic** | **Item No.** | **Guide Questions/Description** | **Reported on**  **Page No.** |
| --- | --- | --- | --- |
| **Domain 1: Research team**  **and reflexivity** | | | |
| *Personal characteristics* | | | |
| Interviewer/facilitator | 1 | Which author/s conducted the interview or focus group? | 6 |
| Credentials | 2 | What were the researcher’s credentials? E.g. PhD, MD | 18 |
| Occupation | 3 | What was their occupation at the time of the study? | 18 |
| Gender | 4 | Was the researcher male or female? | 18 |
| Experience and training | 5 | What experience or training did the researcher have? | N/A |
| *Relationship with*  *participants* | | | |
| Relationship established | 6 | Was a relationship established prior to study commencement? | N/A |
| Participant knowledge of  the interviewer | 7 | What did the participants know about the researcher? e.g. personal  goals, reasons for doing the research |  |
| N/A |
|  |
| Interviewer characteristics | 8 | What characteristics were reported about the inter viewer/facilitator?  e.g. Bias, assumptions, reasons and interests in the research topic |  |
| N/A |
|  |
| **Domain 2: Study design** | | | |
| *Theoretical framework* | | | |
| Methodological orientation and Theory | 9 | What methodological orientation was stated to underpin the study? e.g. grounded theory, discourse analysis, ethnography, phenomenology,  content analysis |  |
| 4,5 |
|  |
| *Participant selection* | | | |
| Sampling | 10 | How were participants selected? e.g. purposive, convenience,  consecutive, snowball |  |
| 5 |
|  |
| Method of approach | 11 | How were participants approached? e.g. face-to-face, telephone, mail,  email |  |
| 5 |
|  |
| Sample size | 12 | How many participants were in the study? | 5 |
| Non-participation | 13 | How many people refused to participate or dropped out? Reasons? | 5 |
| *Setting* | | | |
| Setting of data collection | 14 | Where was the data collected? e.g. home, clinic, workplace | 6 |
| Presence of non-  participants | 15 | Was anyone else present besides the participants and researchers? |  |
| 6 |
|  |
| Description of sample | 16 | What are the important characteristics of the sample? e.g. demographic  data, date |  |
| 6 |
|  |
| *Data collection* | | | |
| Interview guide | 17 | Were questions, prompts, guides provided by the authors? Was it pilot  tested? | 4,5 |
|  |
| Repeat interviews | 18 | Were repeat inter views carried out? If yes, how many? | N/A |
| Audio/visual recording | 19 | Did the research use audio or visual recording to collect the data? | 6 |
| Field notes | 20 | Were field notes made during and/or after the inter view or focus group? | N/A |
| Duration | 21 | What was the duration of the inter views or focus group? | 6 |
| Data saturation | 22 | Was data saturation discussed? | 15 |
| Transcripts returned | 23 | Were transcripts returned to participants for comment and/or | N/A |

| **Topic** | **Item No.** | **Guide Questions/Description** | **Reported on**  **Page No.** |
| --- | --- | --- | --- |
|  |  | correction? |  |
| **Domain 3: analysis and**  **findings** | | | |
| *Data analysis* | | | |
| Number of data coders | 24 | How many data coders coded the data? | 6 |
| Description of the coding  tree | 25 | Did authors provide a description of the coding tree? |  |
| 6 |
|  |
| Derivation of themes | 26 | Were themes identified in advance or derived from the data? | 6 |
| Software | 27 | What software, if applicable, was used to manage the data? | 6 |
| Participant checking | 28 | Did participants provide feedback on the findings? | N/A |
| *Reporting* | | | |
| Quotations presented | 29 | Were participant quotations presented to illustrate the themes/findings?  Was each quotation identified? e.g. participant number |  |
| 6 |
|  |
| Data and findings consistent | 30 | Was there consistency between the data presented and the findings? | 6,7,8,9,10,11,12 |
| Clarity of major themes | 31 | Were major themes clearly presented in the findings? | 6,7,8,9,10,11,12 |
| Clarity of minor themes | 32 | Is there a description of diverse cases or discussion of minor themes? | 6,7,8,9,10,11,12 |

Developed from: Tong A, Sainsbury P, Craig J. Consolidated criteria for reporting qualitative research (COREQ): a 32-item checklist for interviews and focus groups. *International Journal for Quality in Health Care*. 2007. Volume 19, Number 6: pp. 349 – 357

**Appendix B: Interview Guide**

**Part 1: Initial Perspectives**

· Climate topics feature frequently in the media and there are increasing calls for global action for climate.

o Are you interested in climate change or not really and WHY?

o What does climate change mean to you?

o What are your thoughts or concerns? How does it make you feel?

· How does climate change affect you or how do you think climate change is going to affect you?

o When you picture the future, what do you imagine?

· What is your understanding of the link between climate/environmental conditions (heat, air pollution) and health?

o What are the impacts of climate and environmental stressors on health and disease outcomes?

o Which worries you the most and why?

o Are you aware of how healthcare systems may contribute to climate change?

o Any examples from your personal experience?

· Have you ever discussed the topic of climate change or its relevance to health with your peers and family?

o What are you currently doing to respond to climate change (or other actions you tried or considering doing)?

o Are you currently involved in any climate-related activities (including eco-friendly or pro-environmental behaviors)?

**Part 2: Climate and Health**

**TO SHOW AS PROMPT IF NEEDED:**

· Climate change is projected to cause around 250,000 additional deaths per year between 2030 and 2050, due to malnutrition, malaria, diarrhea, and heat stress worldwide.

· Air pollution, exacerbated by climate change, is responsible for over 7 million premature deaths each year.

· Climate change is impacting health in a myriad of ways, including by leading to death and illness from increasingly frequent extreme weather events, the disruption of food systems, increases in zoonoses and food-, water- and vector-borne diseases, and mental health issues.

· Climate change is undermining many of the social determinants for good health, such as livelihoods, equality and access to health care and social support structures.

· These climate-sensitive health risks are disproportionately felt by the most vulnerable and disadvantaged, including women, children, ethnic minorities, poor communities, migrants or displaced persons, older populations, and those with underlying health conditions.

**Reflection**

· What are your thoughts on the information given?

o Has this information changed your view on climate change?

· As a future healthcare provider, what role do you think you will need to play to support adaptation or mitigation of climate health impacts?

o Are you prepared for this? Why or why not?

o What needs to happen to get the healthcare workforce ready to support health outcomes in face of climate change?

· I will now ask you about the medical curriculum.

o How well do you think your current medical curriculum has incorporated contents like this that are relevant to climate change and health?

o How well do you think your current medical curriculum prepares you for addressing climate-related issues in the future when you become a clinician?

o How important do you think it is to integrate planetary health education into medical curriculum? Should medical students be required to learn this?

· What content or training do you think should be integrated into the medical curriculum?

o What content would you like to learn about? Any ideas as to how to weave this in the curriculum?

o What are some other resources or training components that might be helpful?

o What challenges do you foresee in integrating planetary health into your curriculum? Any ideas on how to work round those challenges?

**Part 3: Climate Mitigation and Healthcare**

· The healthcare sector is responsible for about 4.4% of global carbon emissions, meaning if the health sector were a country, it would be the fifth-largest emitter worldwide, after the United States, China, India and Russia, but ahead of Japan and Brazil.

· Healthcare contributes to greenhouse gas emissions through energy consumption, transport, and product manufacture, use, and disposal.

**Reflection**

· What are your thoughts on the information given?

o Were you aware of the healthcare sector’s environmental impact?

o Has this information changed your view on the healthcare sector and its impact on the environment?

· How well has your current medical curriculum incorporated contents related to this topic?

o How important do you think it is to integrate topics such as climate mitigation and sustainable healthcare into the medical curriculum?

· What role do you think healthcare providers should play in addressing climate-related issues?

o What are your thoughts on sustainable healthcare practices? What is your understanding?

o How do you see yourself contributing to these efforts in your role as a future physician?

**Part 4: Final Questions**

· How relevant will climate change be in the future when you become a healthcare provider?

· What challenges related to climate change and sustainability do you foresee?

· Anything else you might like to add or highlight?
